# Supplementary material
Source: HighWire-hosted journal article supplement (https://www.cmaj.ca/highwire/filestream/59503/field_highwire_adjunct_files/0/15-0176-1-at.pdf)
Supplement: 15-0176-1-at.pdf [file 15-0176-1-at.pdf]

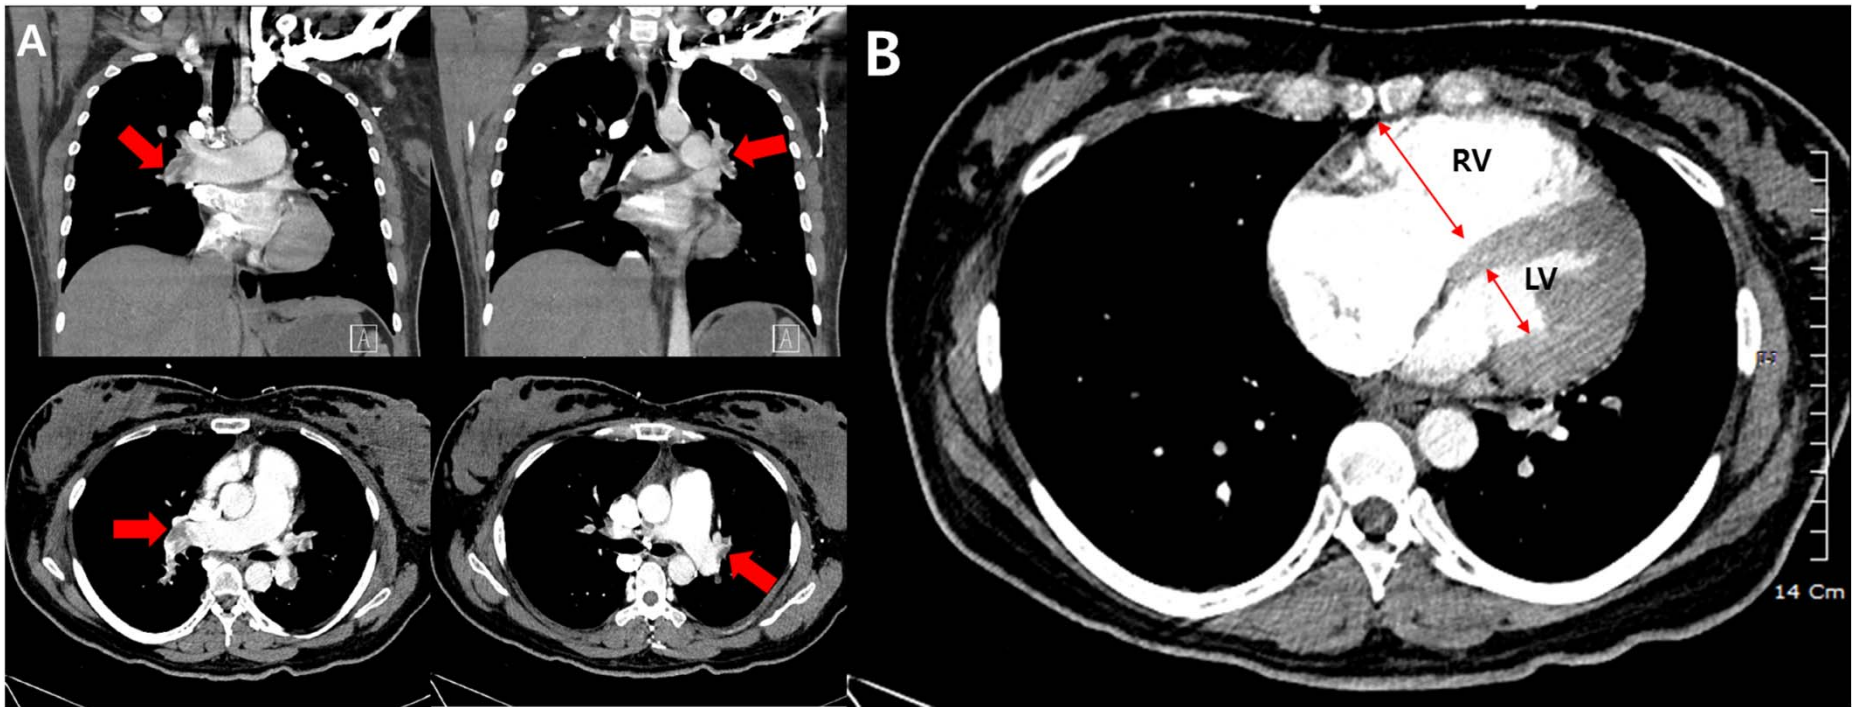

**Appendix 1: Chest computed tomography (CT) angiography in a 35-year-old woman with dyspnea and hypotension within 24 hours after an uncomplicated cesarean delivery at term. (A) CT angiography showing intravascular filling defects (arrows) in both lobar and segmental pulmonary arteries, consistent with pulmonary embolism. (B) Chest CT angiography (axial view) showing right ventricular dilation; the right–left ventricular diameter ratio is 2.27 (51.27/22.57 mm), implying right ventricular dysfunction.**
